# Supplementary material
Source: publisher figshare collection journal article supplement (https://acs.figshare.com/ndownloader/files/7629328)
Supplement: Supplementary file 1 [file 7629328]

## Supporting Information

*for "Size-Controlled Pd Nanoparticle Catalysts Prepared by Galvanic Displacement into a Porous Si-Iron Oxide Nanoparticle Host."*

Taeho Kim,<sup>a</sup> Xin Fu,<sup>b</sup> David Warther,<sup>a</sup> and Michael J. Sailor<sup>\*,a</sup>

<sup>a</sup>*Department of Chemistry and Biochemistry, University of California, San Diego, San Diego, USA*

<sup>b</sup>*Department of Nanoengineering, University of California, San Diego, San Diego, USA*

\*Corresponding author. E-mail: [msailor@ucsd.edu](mailto:msailor@ucsd.edu)

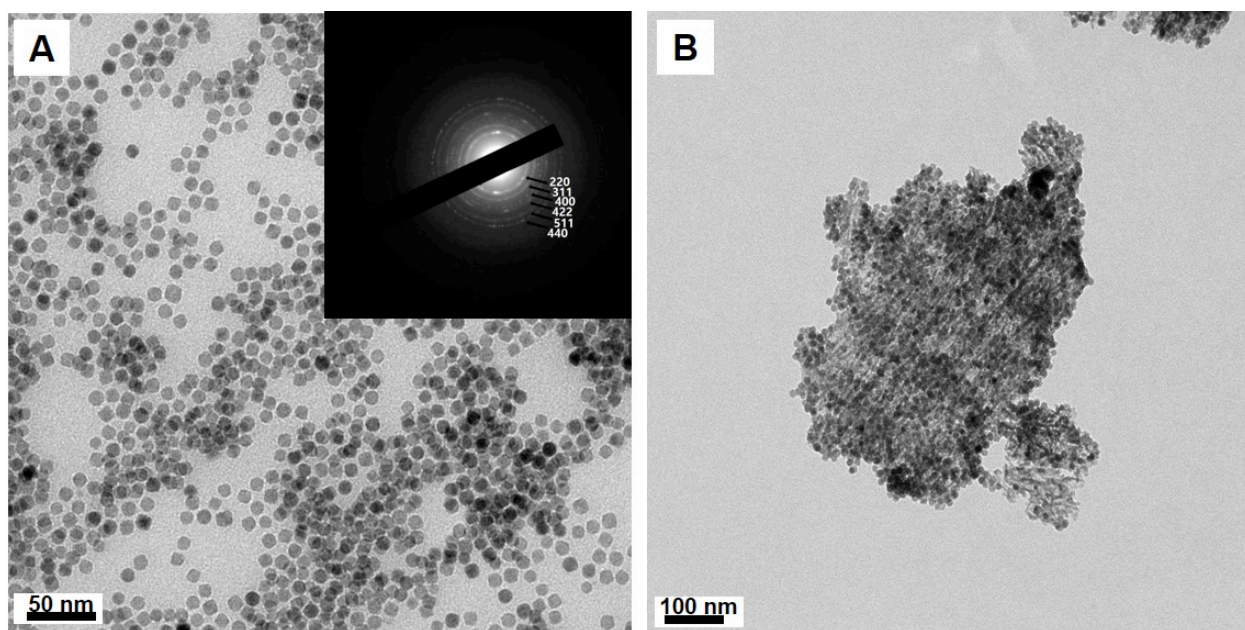

**Figure S1.** Transmission electron microscope (TEM) images of isolated  $\gamma$ -Fe<sub>2</sub>O<sub>3</sub> nanoparticles (A) and composite nanoparticles consisting of  $\gamma$ -Fe<sub>2</sub>O<sub>3</sub> nanoparticles trapped within a porous Si nanoparticle matrix (B). The  $\gamma$ -Fe<sub>2</sub>O<sub>3</sub> nanoparticles in (A) show an average particle size (by DLS) of 7 nm. Inset of this (A) shows the selected area electron diffraction (SAED) pattern indexed with the cubic structure of the maghemite phase (JCPDS No. 39-1346) of iron oxide nanoparticles. The result of infiltration of  $\gamma$ -Fe<sub>2</sub>O<sub>3</sub> nanoparticles into porous Si nanoparticles is referred to in this work as magnetic porous Si nanoparticles (MpSiNPs).

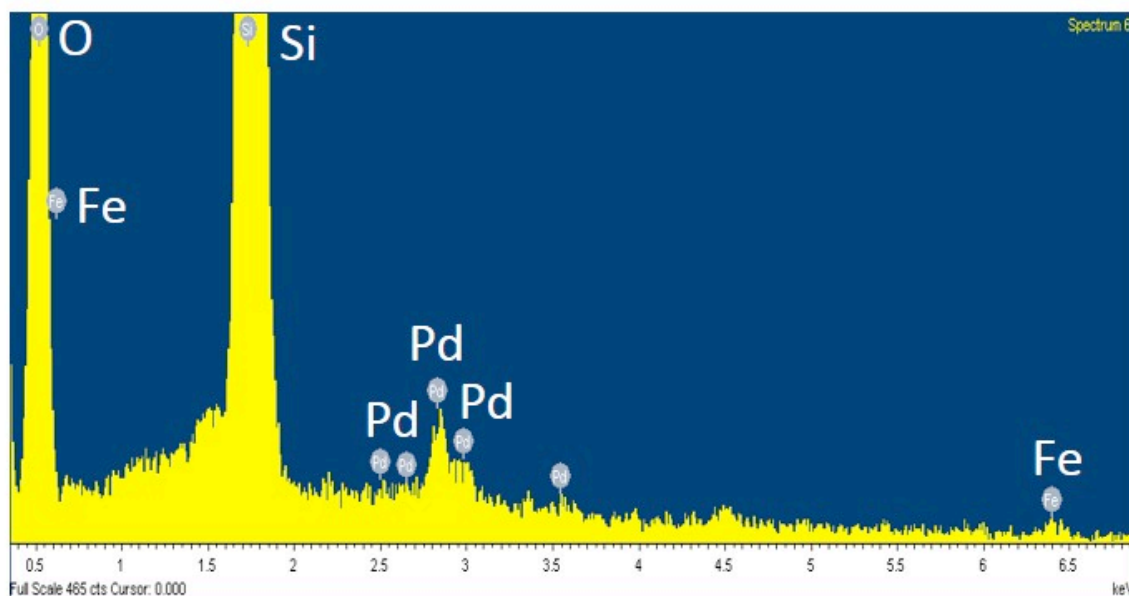

**Figure S2.** Energy-dispersed X-ray spectrum (EDS) of magnetic Pd-loaded porous Si nanoparticles (MpSi-PdNPs) prepared by sequential infiltration of  $\gamma$ -Fe<sub>2</sub>O<sub>3</sub> nanoparticles and electroless deposition of Pd within a porous Si nanoparticle host. The coordination complex [Pd(NH<sub>3</sub>)<sub>4</sub>]<sup>2+</sup> was used as the palladium source.

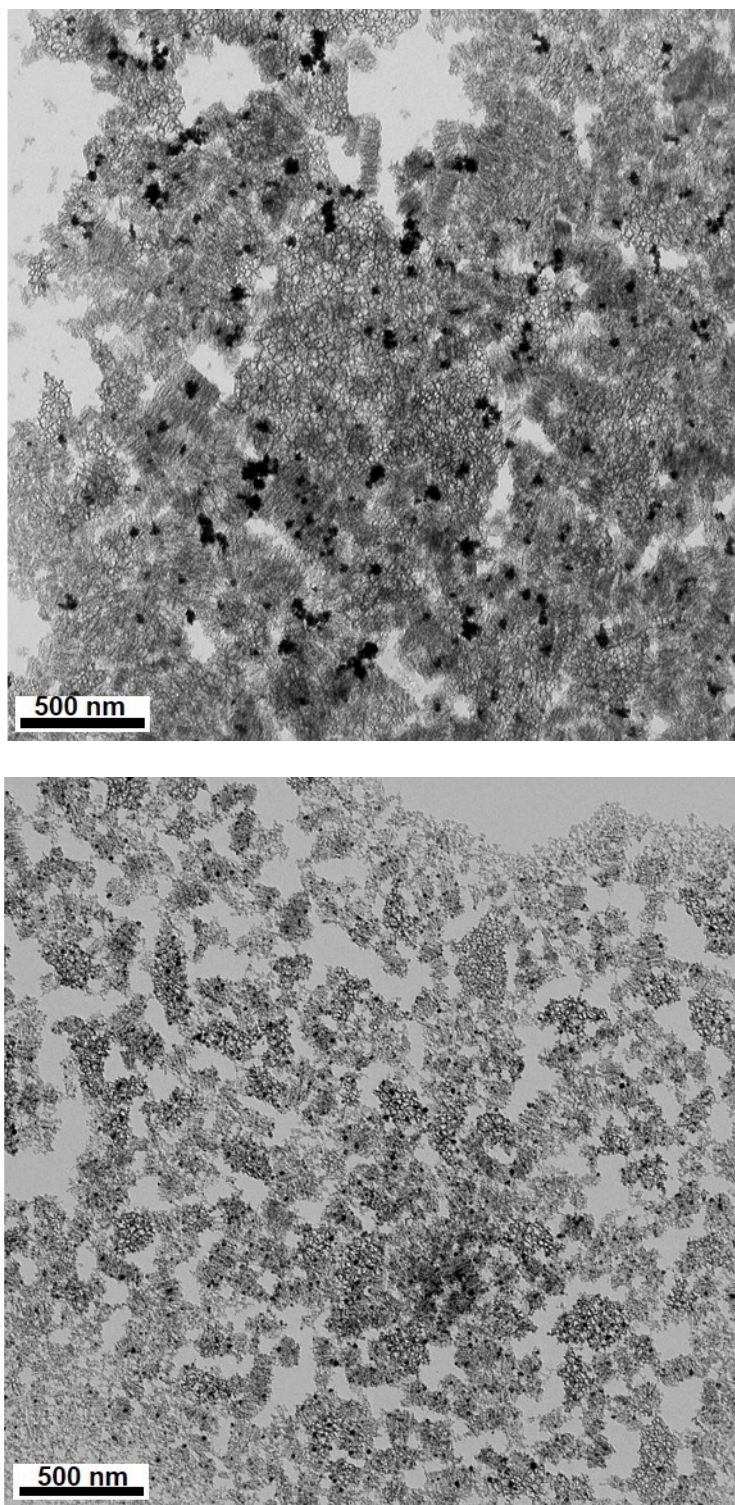

**Figure S3.** Low magnification TEM images of the result of Pd deposition within porous Si nanoparticles using aqueous PdCl<sub>2</sub> (top image) or [Pd(NH<sub>3</sub>)<sub>4</sub>]<sup>2+</sup> (bottom image) as the palladium source.



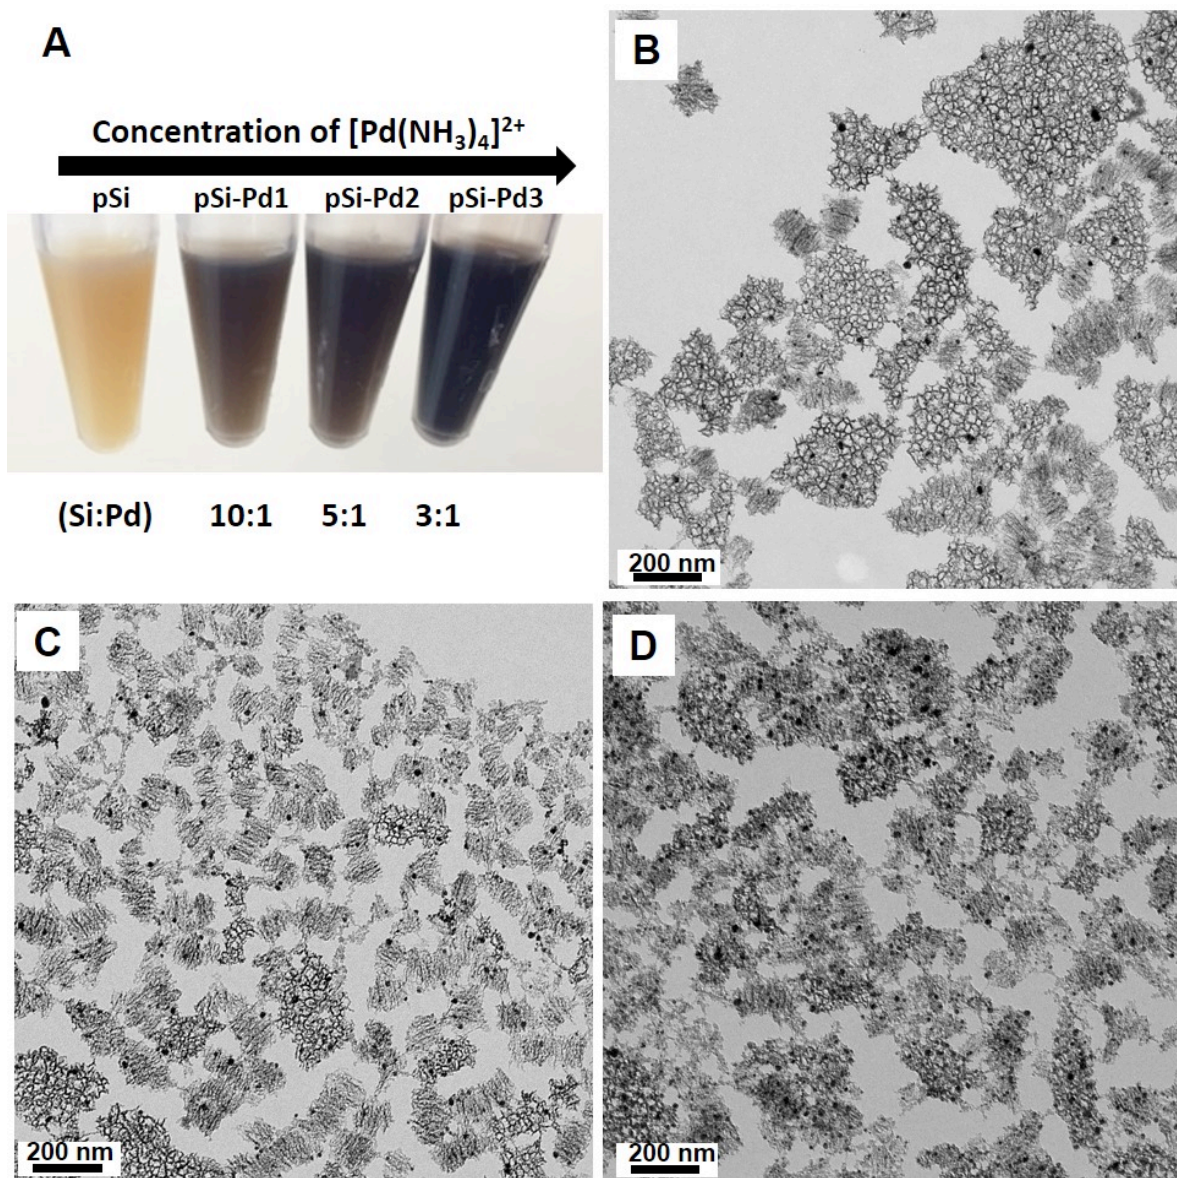

**Figure S4.** Photograph and TEM images of porous Si-Pd nanoparticles (pSi-PdNPs) prepared by introducing a given concentration of  $[\text{Pd}(\text{NH}_3)_4]^{2+}$  solution to a set concentration of empty porous Si nanoparticles. (A) Photograph of pSi-PdNP suspensions prepared with increasing concentration of  $[\text{Pd}(\text{NH}_3)_4]^{2+}$ : 0, 1, 2, 4  $\mu\text{L}$  of 0.1 M  $[\text{Pd}(\text{NH}_3)_4]^{2+}$  solution, added to 0.2 mL of pSiNP (1 mg/mL) in deionized water. The Si to Pd mass ratio of the starting materials for the reaction is given below each vial. The vial on the far left is a control containing no Pd. The color of the nanoparticle solutions changes from yellow to dark brown to black with increasing Pd content. (B) TEM image of pSi-PdNPs with Si:Pd mass ratio of 10:1 (pSi-Pd1). (C) TEM image of pSi-PdNPs with Si:Pd mass ratio of 5:1 (pSi-Pd2). (D) TEM image of pSi-PdNPs with Si:Pd mass ratio of 3:1 (pSi-Pd3). Increasing the concentration of  $[\text{Pd}(\text{NH}_3)_4]^{2+}$  solution increases the number density of Pd nanoparticles in the pSi matrix without substantially changing Pd nanoparticle size.

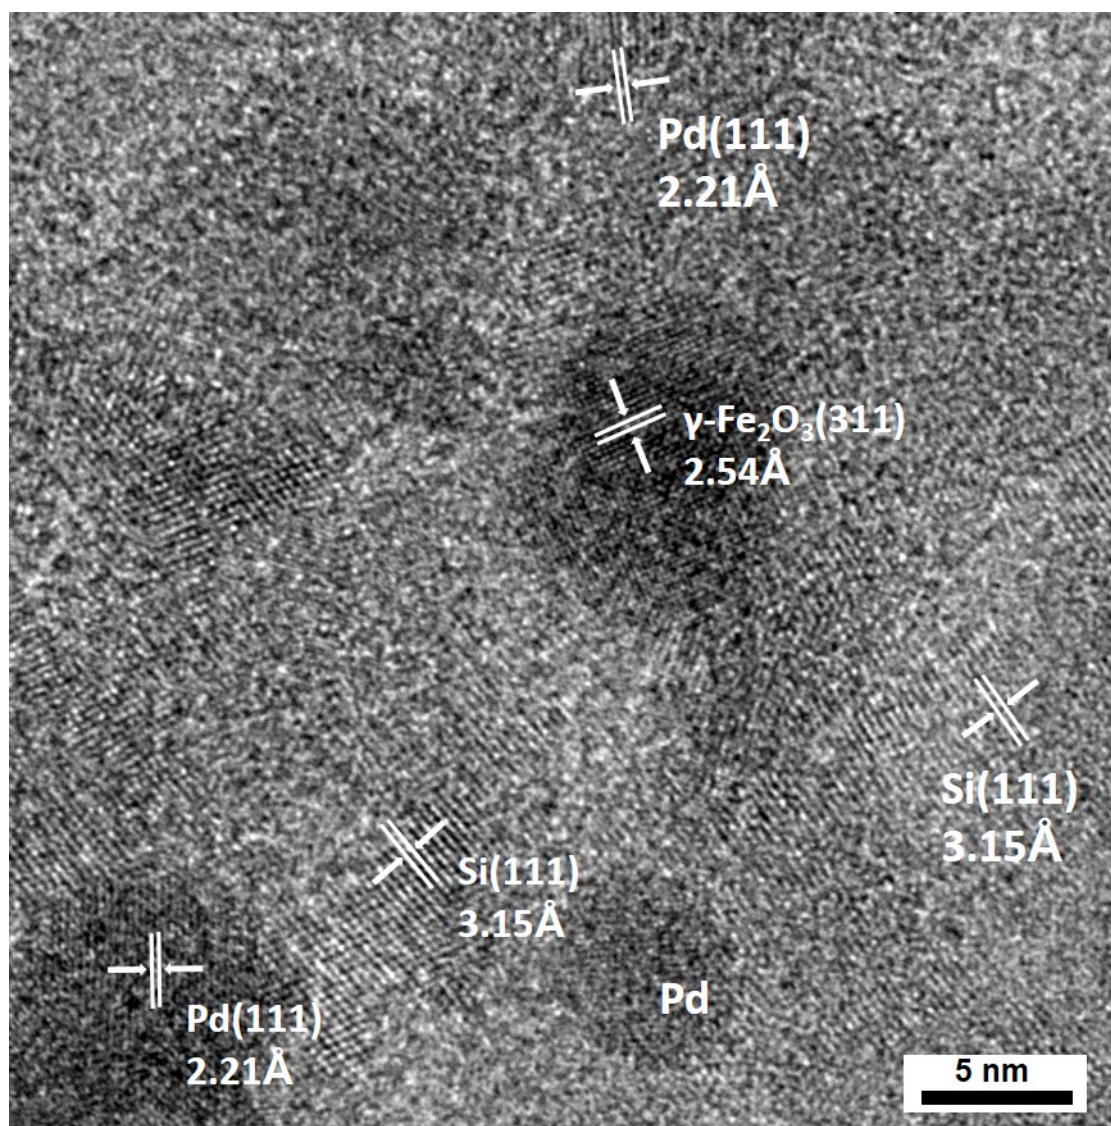

**Figure S5.** High-resolution TEM images of a single MpSi-Pd composite nanoparticle. All three nanoparticles are distinguishable, and the measured lattice spacings are: 3.15 Å, assigned to the (111) plane of Si; 2.54 Å, assigned to the (311) plane of  $\gamma\text{-Fe}_2\text{O}_3$ ; and 2.21 Å, assigned to the (111) plane of Pd.



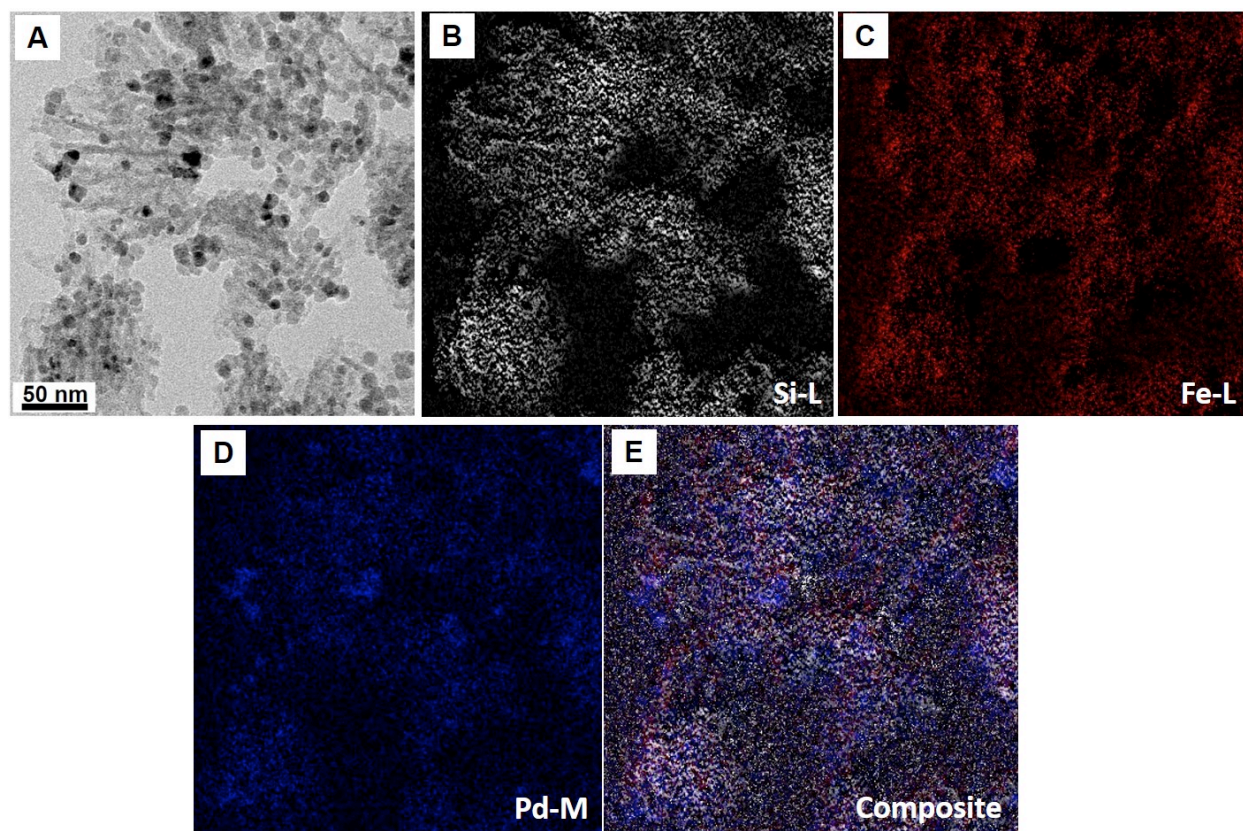

**Figure S6.** (A) TEM image of MpSi-Pd composite nanoparticles. (B)-(D) corresponding elemental maps of Si, Fe, and Pd derived from 2-dimensional energy-dispersive X-ray spectroscopy (EDS) maps. (E) overlay of images (B), (C), and (D).

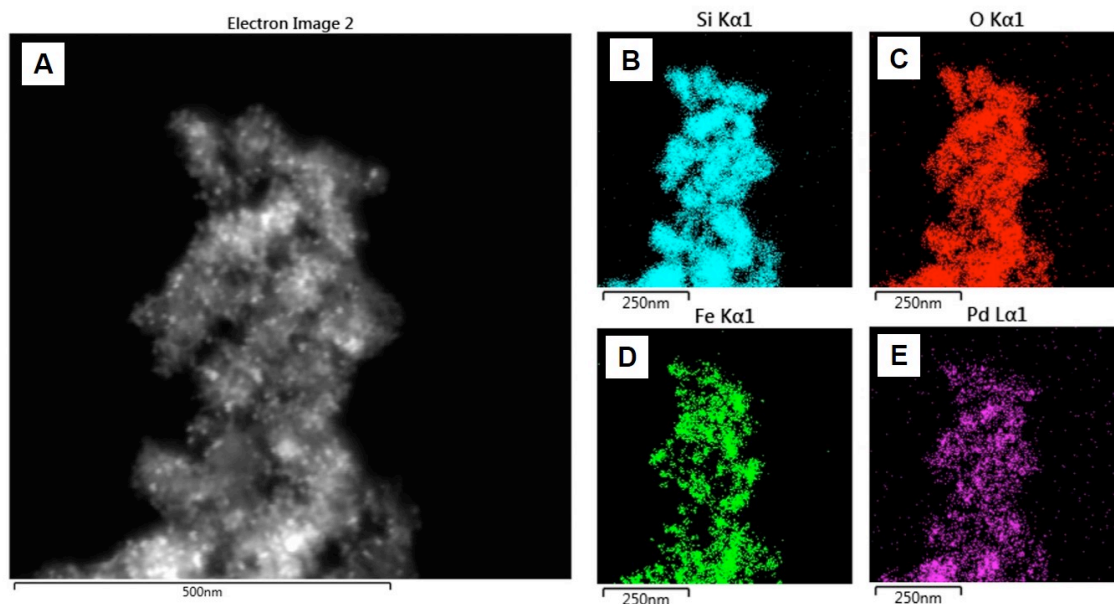

**Figure S7.** (A) High-angle annular dark-field (HAADF) STEM image of MpSi-Pd nanoparticles. (B)-(E) EDS elemental maps of the Si, O, Fe, and Pd signals as indicated.



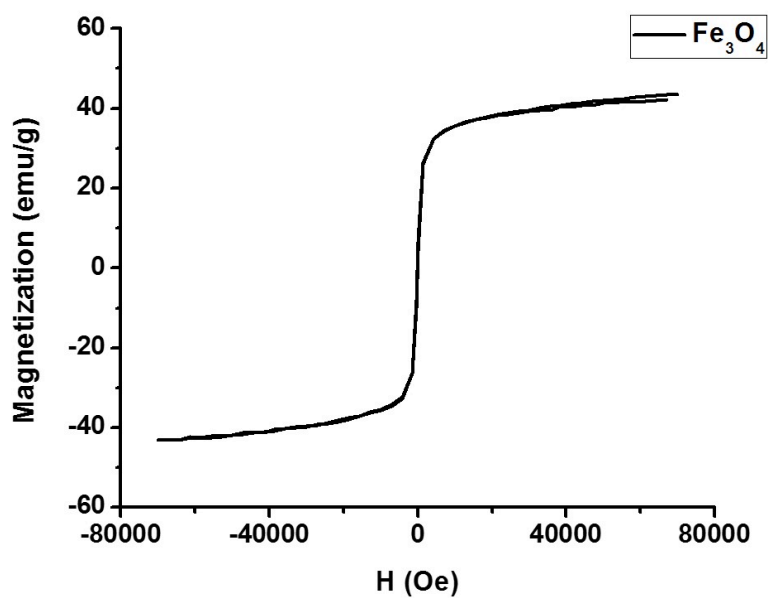

**Figure S8.** Magnetization curve (298 K) of  $\gamma\text{-Fe}_2\text{O}_3$  nanoparticles used in this study. Saturation magnetization is 48 emu/g.

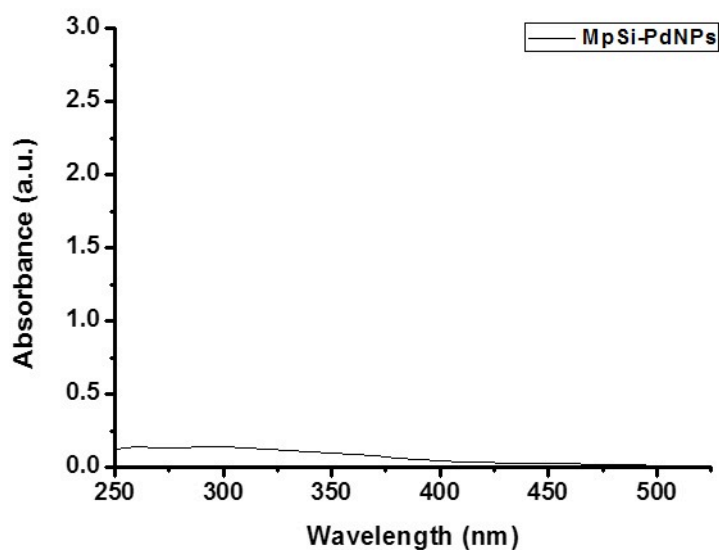

**Figure S9.** UV-Vis absorbance spectrum of the magnetic Pd-loaded porous Si nanoparticles (MpSi-PdNPs) used in this work, dispersed in deionized water. Nanoparticle concentration is comparable to that used in the catalytic reactions (see Figure 4 in the main text). The data show that at the concentrations used in the catalysis study, there is little spectral interference from nanoparticle absorbance.

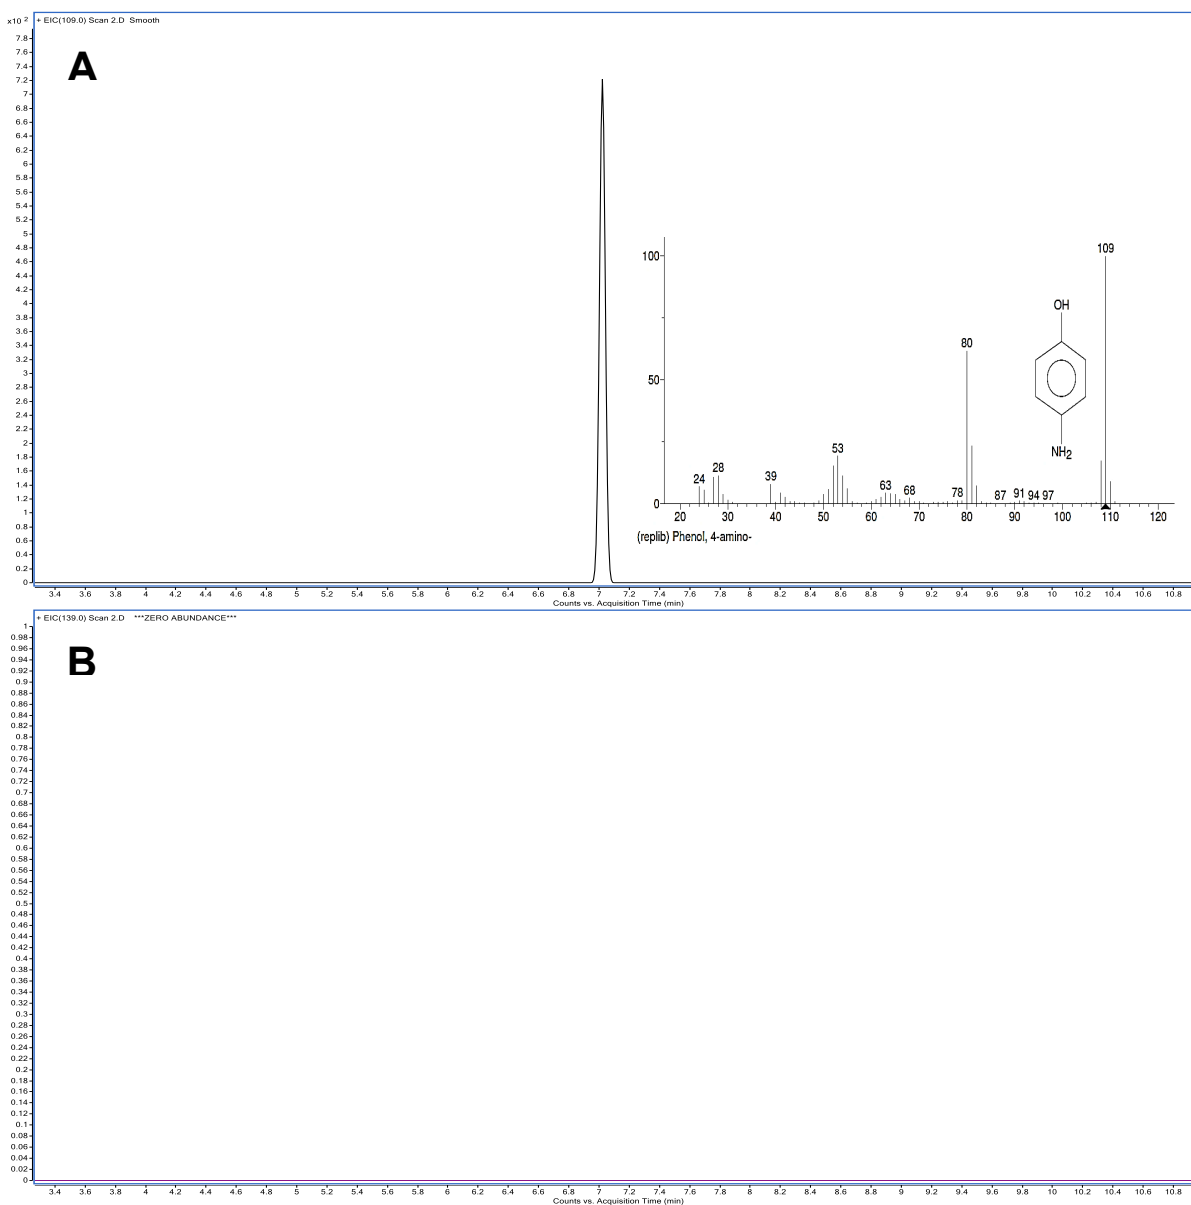

**Figure S10.** GC-MS analysis of catalytic reaction products. (A) The extracted ion chromatogram at  $m/z = 109$ . The  $M^+$  peak is assigned to 4AP ( $C_6H_7NO$ ). (B) The extracted ion chromatogram at  $m/z = 139$ . The  $M^+$  peak is assigned to 4NP ( $C_6H_5NO_3$ ). Inset of (A) shows the mass spectrum of the product.

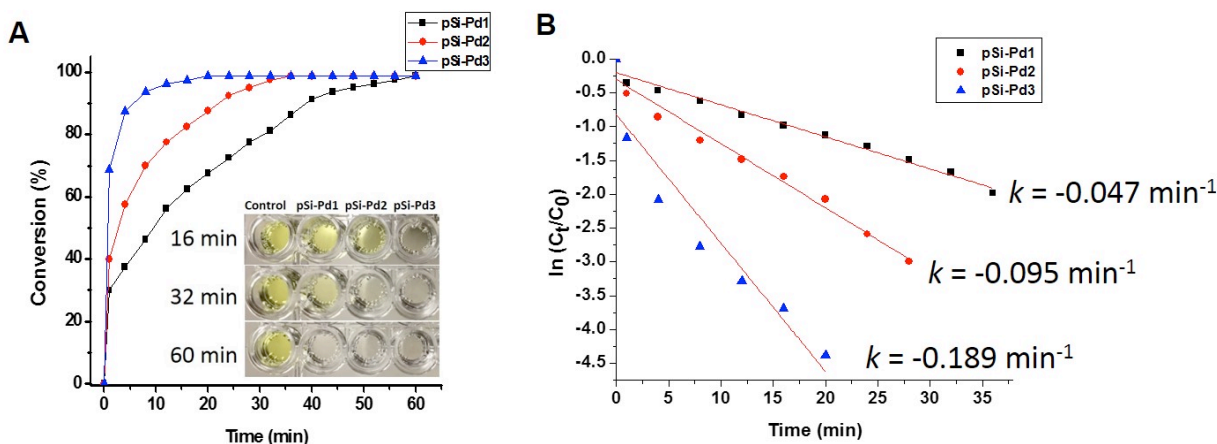

**Figure S11.** Effect of mass loading of Pd on the catalytic activity of Pd-loaded porous Si nanoparticles. The particles in this experiment were not loaded with  $\gamma\text{-Fe}_2\text{O}_3$  nanoparticles and  $[\text{Pd}(\text{NH}_3)_4]^{2+}$  was used as the Pd source. (A) Conversion of 4-nitrophenol (4NP) to 4-aminophenol (4AP) using the indicated Pd nanocomposite catalysts as a function of time: ■ pSi-Pd1 corresponds to Si:Pd mass ratio of 10:1; ● pSi-Pd2 corresponds to Si:Pd mass ratio of 5:1; ▲ pSi-Pd3 corresponds to Si:Pd mass ratio of 3:1. The inset shows photographs of the reaction at the indicated times after initiation. Control is empty porous Si nanoparticles (not loaded with Pd). (B) Plot of  $\ln(C_t/C_0)$  versus time for the reduction of 4NP in the presence of the indicated Pd nanoparticle catalysts. The rate constant  $k$  is determined from the slope of the least-squares fit line. All experiments contained the same total mass of composite nanoparticle.



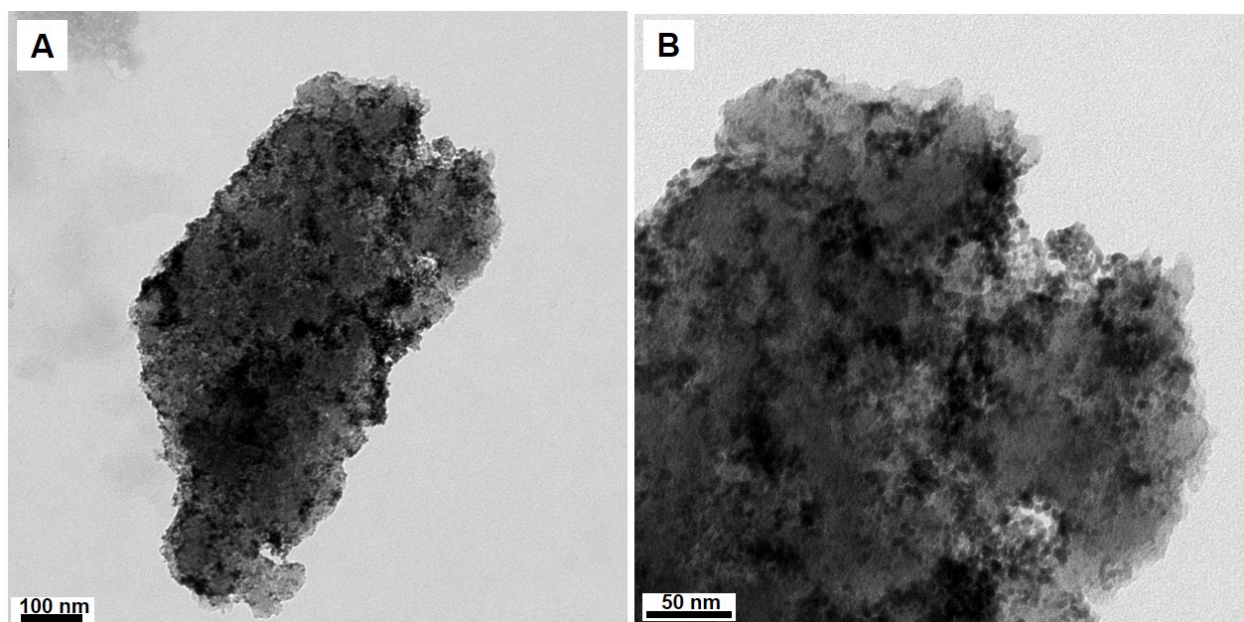

**Figure S12.** TEM images of commercial Pd/C catalyst used in this study. Sample obtained from Sigma Aldrich Chemicals (Atlanta, GA), Cat # 205699

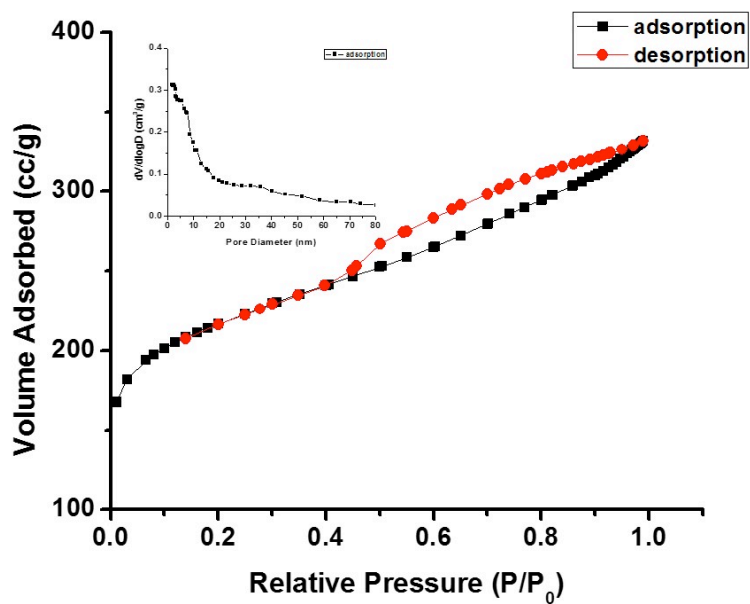

**Figure S13.**  $\text{N}_2$  adsorption/desorption isotherm of commercial Pd/C catalyst. The inset shows the pore size distribution. The specific surface area (BET method) and pore volume (BJH method) were  $762.2 \text{ m}^2/\text{g}$ ,  $0.51 \text{ cm}^3/\text{g}$ , and the average pore diameter was determined to be 2.6 nm.

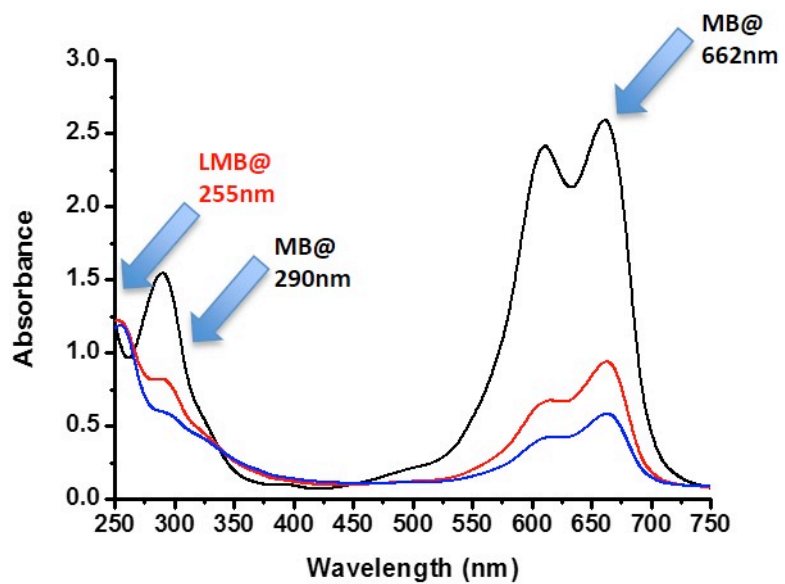

**Figure S14.** UV-visible absorbance spectra for the reduction of organic dye MB by NaBH<sub>4</sub>. After the addition of MpSi-Pd nanoparticles, the absorption peaks for MB (290 nm and 650 nm) decreased and new band for Leuco-MB at 255nm appeared in the spectrum.

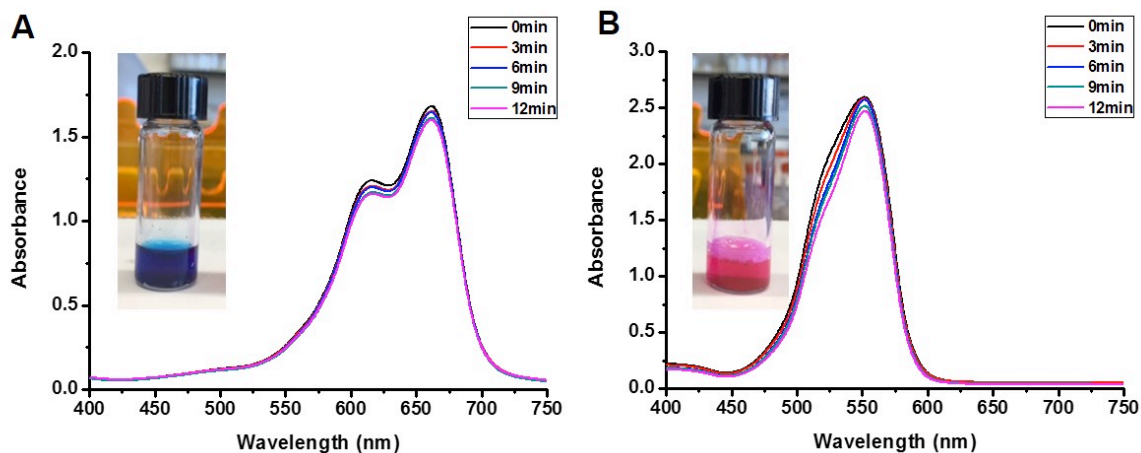

**Figure S15.** Time-dependent UV-visible absorbance spectra for the reduction of organic dyes by  $\text{NaBH}_4$ , after the addition of MpSi nanoparticles (1mg/mL). No absorbance changes were detected within 12 mins for (A) methylene blue (MB) aqueous solution (1 mM) and (B) Rhodamine B (RhoB) aqueous solution (1 mM). Insets show photographs of the reaction mixtures 12 mins after the addition of the MpSi nanoparticles to the dye +  $\text{NaBH}_4$  solutions.



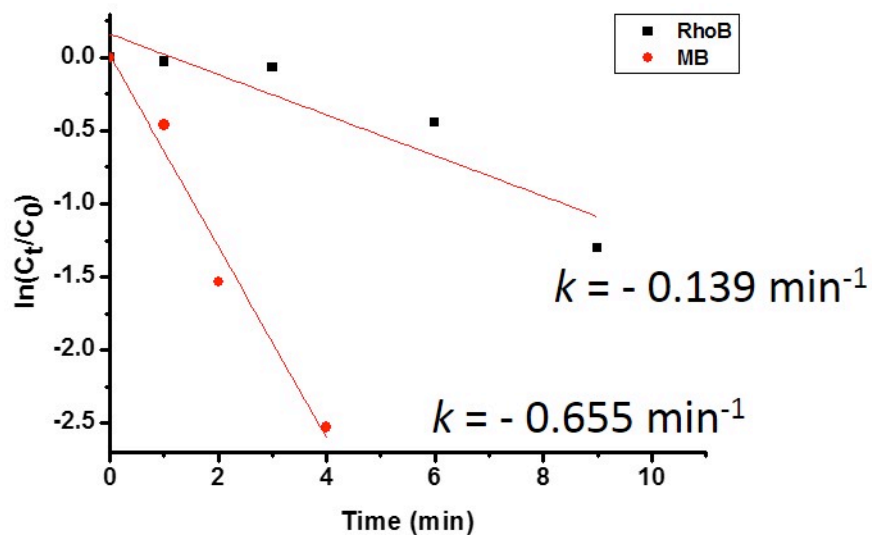

**Figure S16.** Plot of  $\ln(C_t/C_0)$  versus time for reduction of the organic dyes methylene blue (MB) and rhodamine B (RhoB) by  $\text{NaBH}_4$ , catalyzed by MpSi-Pd nanocomposite; ■ RhoB (1 mM) ; ● MB (1 mM). The rate constant  $k$  is estimated from the slope of straight line of  $\ln(C_t/C_0)$  versus reaction time.
